# Supplementary material for: Independent and Interactive Effects of Genetic Background and Sex on Tissue Metabolomes of Adipose, Skeletal Muscle, and Liver in Mice
Source: MDPI journal article supplement (doi:10.3390/metabo12040337), 2022-04-08
Supplement: s1 [file s1]

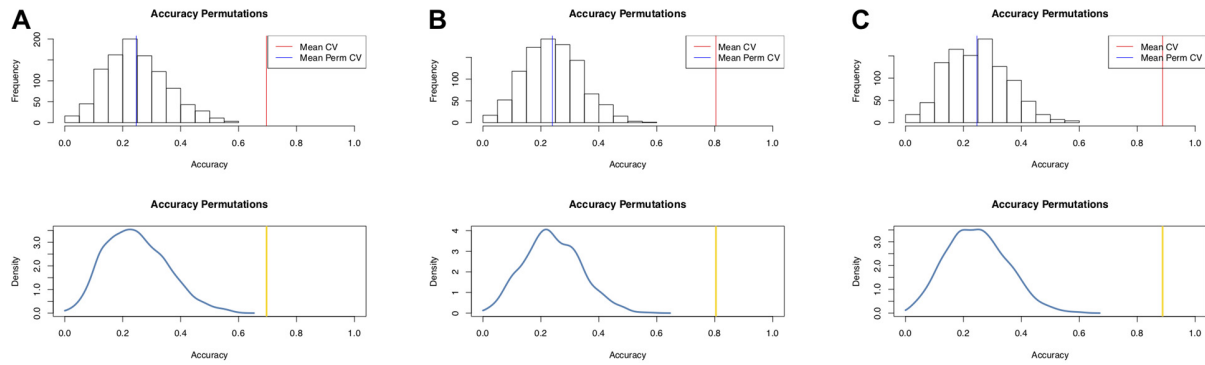

### Supplemental Figure S1. Density and frequency plots of PLS-DA permutations.

1000 permutations were performed and plotted for adipose,  $p < 0.001$  (**A**), muscle,  $p < 0.001$  (**B**), and liver,  $p < 0.001$  (**C**).

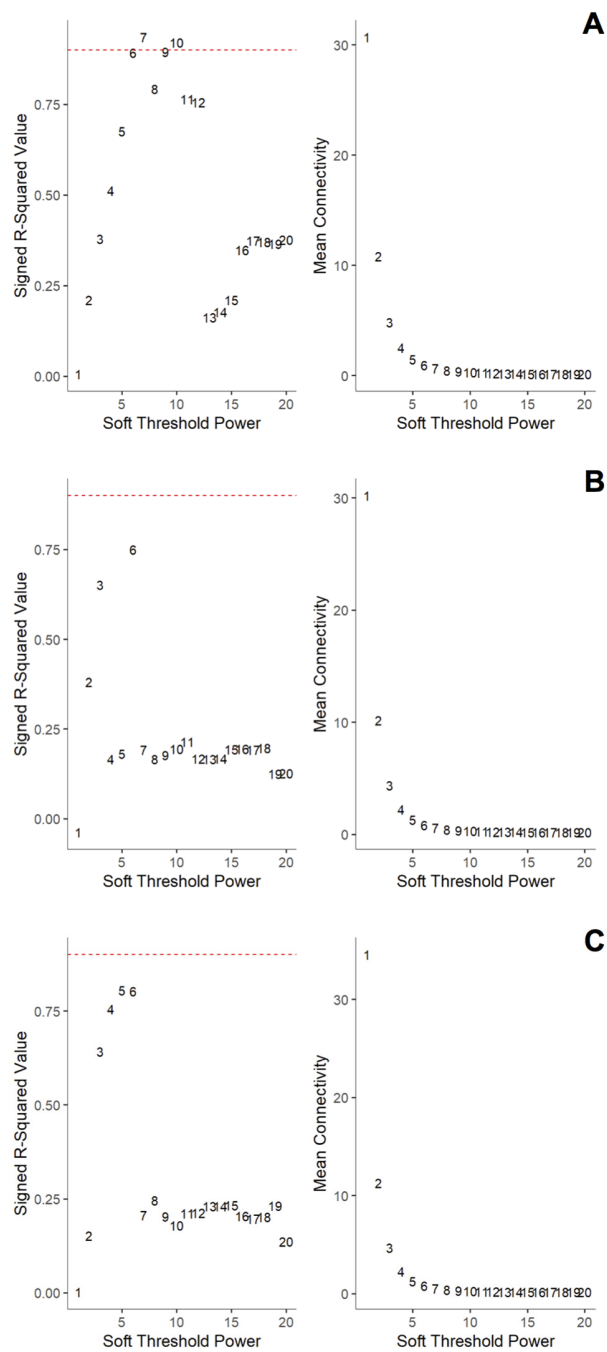

**Supplemental Figure S2. Choosing soft threshold power.** The smooth softmax function is used to create a scale-free topology on the metabolite abundance network. The aim is to reach an r-squared value of 0.9, however, if that is unattainable then the highest r-squared value is identified. The soft threshold power for adipose is 6 (**A**), muscle is 3 (**B**), and liver is 5 (**C**).

A

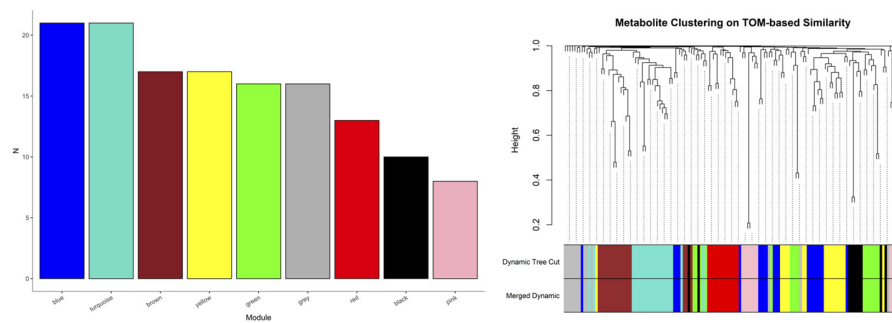

B

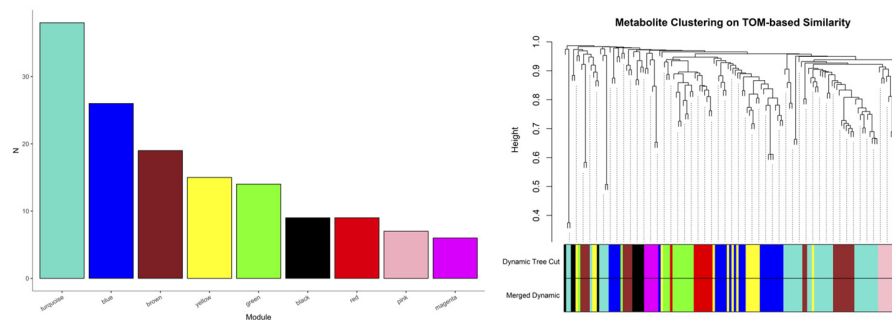

C

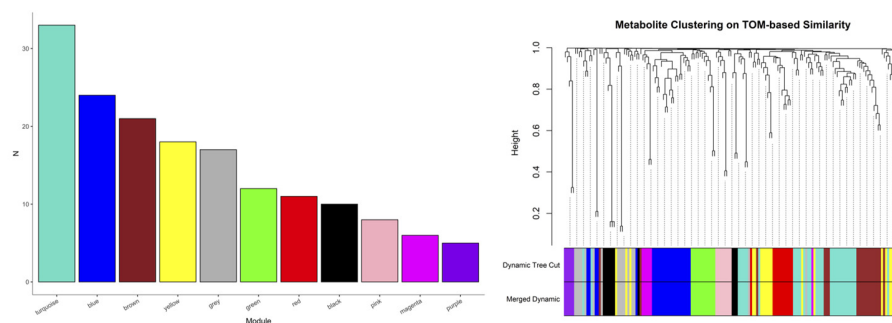

**Supplemental Figure S3. Left: Topological Overlap Matrix (TOM).** The TOM is created for the adjacency matrix to reduce noise and spurious associations. Modules that are then determined to be highly correlated ( $r > 0.75$ ) are merged to reduce

redundancy. Merged modules were identified for adipose (**A**), muscle (**B**), and liver (**C**) tissue. **Right: Module Barplots.** The number of each metabolites present in each module, as well as the number of modules created for adipose (**A**), muscle (**B**), and liver (**C**) tissue.
